# Supplementary material
Source: publisher site journal article supplement (https://e-cmh.org/upload/media/cmh-2021-0332-suppl5.pdf)
Supplement: Supplementary file 1 [file cmh-2021-0332-suppl5.pdf]

**Supplementary Table 5.** Descriptive statistics of the participants with intermediate and high FLI after propensity score matching

|                                      | Intermediate (FLI $\geq$ 30 and $<$ 60; n=145,799) | High (FLI $\geq$ 60; n=145,799) |
|--------------------------------------|----------------------------------------------------|---------------------------------|
| Logit propensity score               |                                                    |                                 |
| Before matching                      | 1.06 (0.81–1.25)                                   | 1.10 (0.86–1.29)                |
| After matching                       | 1.05 (0.80–1.25)                                   | 1.02 (0.76–1.13)                |
| Age (years)                          | 65 (62–69)                                         | 66 (64–70)                      |
| Sex                                  |                                                    |                                 |
| Men                                  | 42,860 (29.4)                                      | 44,502 (30.5)                   |
| Women                                | 102,939 (70.6)                                     | 101,297 (69.5)                  |
| Household income*                    |                                                    |                                 |
| Upper half                           | 90,572 (62.1)                                      | 89,865 (61.6)                   |
| Lower half                           | 55,227 (37.9)                                      | 55,934 (38.4)                   |
| Body mass index (kg/m <sup>2</sup> ) | 23.4 (22.2–24.7)                                   | 25.4 (23.9–27.1)                |
| Fasting serum glucose (mg/dL)        | 94 (87–103)                                        | 98 (90–111)                     |
| Cigarette smoking                    |                                                    |                                 |
| Never smoker                         | 128,545 (88.2)                                     | 128,818 (88.4)                  |
| Past smoker                          | 1,676 (1.1)                                        | 1,258 (0.9)                     |
| Current smoker                       | 15,578 (10.7)                                      | 15,723 (10.8)                   |
| MVPA                                 |                                                    |                                 |
| $\leq$ 2 times/week                  | 103,896 (71.3)                                     | 109,550 (75.1)                  |
| 3–4 times/week                       | 14,162 (9.7)                                       | 12,344 (8.5)                    |
| $\geq$ 5 times/week                  | 27,741 (19.0)                                      | 23,905 (16.4)                   |
| CCI                                  |                                                    |                                 |
| 0                                    | 68,353 (46.9)                                      | 51,943 (35.6)                   |
| 1                                    | 40,516 (27.8)                                      | 40,222 (27.6)                   |
| $\geq$ 2                             | 36,930 (25.3)                                      | 53,634 (36.8)                   |

Values are presented as median (interquartile range) or number (%).

FLI, fatty liver index; MVPA, moderate-to-vigorous physical activity; CCI, Charlson comorbidity index.

\*Proxy for socioeconomic status based on the insurance premium from the National Health Insurance Service.
